# Supplementary material for: The Circadian Clock Gene Period1 Connects the Molecular Clock to Neural Activity in the Suprachiasmatic Nucleus
Source: PubMed Central journal article supplement (PMC4710129; doi:10.1177/1759091415610761), 2015-10-30

Supplemental figure 1

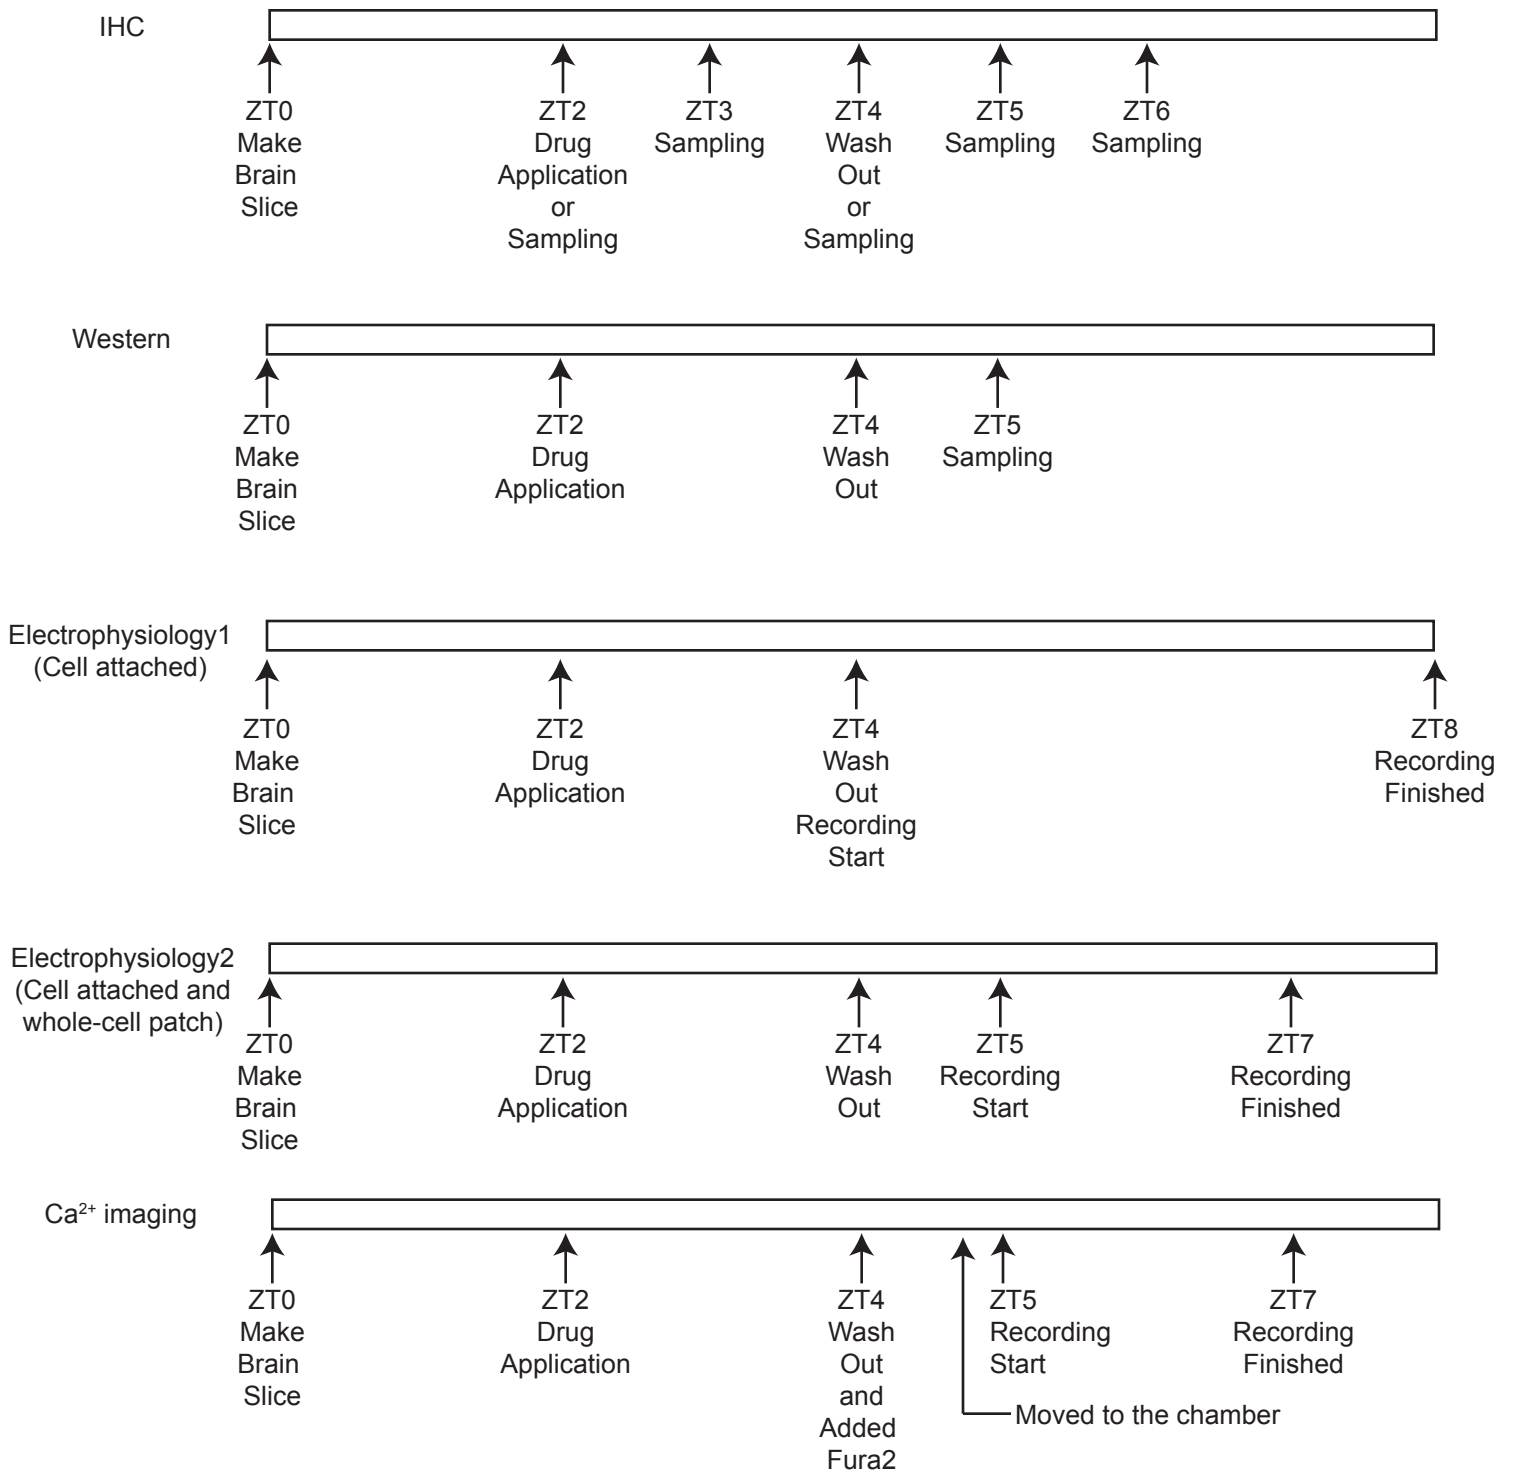

Supplement: Supplemental_Figure_1_761.pdf [file Supplemental_Figure_1_761.pdf]
